# Supplementary material for: Electrochemical oxidation of diclofenac on CNT and M/CNT modified electrodes
Source: Royal Society of Chemistry journal article supplement (doi:10.1039/d1nj01117k), 2021-01-01
Supplement: d1nj01117k1.pdf [file d1nj01117k1.pdf]

## Electronic Supplementary Information (ESI)

### Electrochemical oxidation of Diclofenac on CNT and M/CNT modified electrodes

M. Ferreira<sup>a</sup>, S. Güney<sup>b</sup>, I. Kuźniarska-Biernacka<sup>a,c</sup>, O.S.G.P. Soares<sup>d</sup>, J.L. Figueiredo<sup>d</sup>, M.F.R. Pereira<sup>d</sup>, I.C. Neves<sup>a,e</sup>, A.M. Fonseca<sup>a,e</sup>, P. Parpot<sup>\*a,e</sup>

<sup>a</sup> CQUM, Centro de Química, Escola de Ciências, Universidade do Minho, Campus Gualtar, 4710-057, Braga, Portugal.

<sup>b</sup> Department of Chemistry, Technical University of Istanbul, Maslak, 34467 Sarıyer/Istanbul, Turkey.

<sup>c</sup> REQUIMTE/LAQV, Departamento de Química e Bioquímica, Faculdade de Ciências, Universidade do Porto, Rua do Campo Alegre s/n, 4169-007 Porto, Portugal.

<sup>d</sup> Laboratório de Catálise e Materiais (LCM), Laboratório Associado LSRE-LCM, Departamento de Engenharia Química, Faculdade de Engenharia, Universidade do Porto, Rua Dr. Roberto Frias, 4200-465 Porto, Portugal

<sup>e</sup> CEB - Centre of Biological Engineering, Universidade do Minho, Campus Gualtar, 4710-057, Braga, Portugal

**Table S1.** Maximum current densities and oxidation potentials for CNT, Pt/CNT and Ru/CNT modified electrodes in different supporting electrolytes.

| Electrode | Supporting electrolyte                                     | Peak A         |                           | Peak B         |                           | Peak C         |                           |
|-----------|------------------------------------------------------------|----------------|---------------------------|----------------|---------------------------|----------------|---------------------------|
|           |                                                            | Ep(ox) (V/SCE) | J(ox)/mA.mg <sup>-1</sup> | Ep(ox) (V/SCE) | J(ox)/mA.mg <sup>-1</sup> | Ep(ox) (V/SCE) | J(ox)/mA.mg <sup>-1</sup> |
| CNT       | NaOH (0.5M)                                                | -0.07          | 10.23                     | 0.17           | 4.18                      | ----           | ----                      |
|           | NaHCO <sub>3</sub> /Na <sub>2</sub> CO <sub>3</sub> buffer | -0.11          | 3.06                      | 0.23           | 3.86                      | 0.64           | 2.88                      |
| Pt/CNT    | NaOH (0.5M)                                                | -0.03          | 3.50                      | 0.21           | 3.95                      | ----           | ----                      |
|           | NaHCO <sub>3</sub> /Na <sub>2</sub> CO <sub>3</sub> buffer | 0.01           | 2.62                      | 0.32           | 3.06                      | 0.56           | 4.79                      |
|           | NaCl (0.1M)/phosphate buffer                               | 0.31           | 4.55                      | 0.81           | 2.37                      | ----           | ----                      |
| Ru/CNT    | NaOH (0.5M)                                                | -0.09          | 7.48                      | 0.16           | 4.04                      | ----           | ----                      |
|           | NaHCO <sub>3</sub> /Na <sub>2</sub> CO <sub>3</sub> buffer | -0.02          | 2.77                      | 0.498          | 2.60                      | 0.695          | 2.04                      |
|           | NaCl (0.1M)/phosphate buffer                               | 0.16           | 5.21                      | 0.30           | 5.41                      | 0.66           | 4.26                      |

**Table S2.** Kinetic parameters of the oxidation reaction of DCF in 0.5 M NaOH, 0.1 M carbonate buffer and 0.1 M NaCl/phosphate buffer, on CNT, Pt/CNT and Ru/CNT modified electrodes.

| Electrode | Supporting electrolyte                                     | Peak A                                 |       |               | Peak B                                 |       |               | Peak C                                 |       |               |
|-----------|------------------------------------------------------------|----------------------------------------|-------|---------------|----------------------------------------|-------|---------------|----------------------------------------|-------|---------------|
|           |                                                            | Sweep rate range (mV s <sup>-1</sup> ) | Slope | Limiting step | Sweep rate range (mV s <sup>-1</sup> ) | Slope | Limiting step | Sweep rate range (mV s <sup>-1</sup> ) | Slope | Limiting step |
| Pt/CNT    | NaOH (0.5M)                                                | 10 to 250                              | 0.68  | mixed         | 10 to 250                              | 0.50  | diffusion     |                                        |       |               |
| Ru/CNT    | NaOH (0.5M)                                                | 10 to 500                              | 0.75  | mixed         | 10 to 250                              | 0.73  | mixed         |                                        | ----  |               |
| Pt/CNT    | NaHCO <sub>3</sub> /Na <sub>2</sub> CO <sub>3</sub> buffer | 10 to 200                              | 0.75  | mixed         |                                        | ----  |               | 10 to 250                              | 0.70  | mixed         |
| Ru/CNT    | NaHCO <sub>3</sub> /Na <sub>2</sub> CO <sub>3</sub> buffer | 10 to 100                              | 1.04  | adsorption    | 10 to 50                               | 0.55  | diffusion     | 20 to 250                              | 0.90  | adsorption    |
| Pt/CNT    | NaCl (0.1M)/phosphate buffer                               | 10 to 250                              | 0.95  | adsorption    | 10 to 200                              | 0.60  | diffusion     |                                        | ----  |               |
| Ru/CNT    | NaCl (0.1M)/phosphate buffer                               | 10 to 150                              | 0.49  | diffusion     | 10 to 250                              | 0.76  | mixed         | 10 to 150                              | 0.61  | diffusion     |

**Table S3.** The comparison of the published studies on DCF electrooxidation.

| Working electrode                            | Area (cm <sup>2</sup> ) | Supporting electrolyte                                        | [DCF] (mg/L) | Time (h) | R (%)            | Ref.      |
|----------------------------------------------|-------------------------|---------------------------------------------------------------|--------------|----------|------------------|-----------|
| BDD <sup>a</sup>                             | 12                      | 0.1 M Na <sub>2</sub> SO <sub>4</sub>                         | 30           | 4        | 72 <sup>b</sup>  | 55        |
| Ti/Pt                                        | 2                       | 0.5 M Na <sub>2</sub> SO <sub>4</sub>                         | 200          | 5        | 70               | 56        |
| BDD <sup>a</sup>                             | 2                       | 0.5 M Na <sub>2</sub> SO <sub>4</sub>                         | 200          | 5        | 100              | 56        |
| Ti/SnO <sub>2</sub> -Sb                      | 2                       | 0.5 M Na <sub>2</sub> SO <sub>4</sub>                         | 200          | 5        | 83               | 56        |
| Ti/SnO <sub>2</sub> -Sb-Pt(3%) <sup>c</sup>  | 2                       | 0.5 M Na <sub>2</sub> SO <sub>4</sub>                         | 200          | 5        | 90               | 56        |
| Ti/SnO <sub>2</sub> -Sb-Pt(13%) <sup>c</sup> | 2                       | 0.5 M Na <sub>2</sub> SO <sub>4</sub>                         | 200          | 5        | 91               | 56        |
| PC                                           | 1                       | 0.05 M Na <sub>2</sub> SO <sub>4</sub>                        | 20-200       | 1        | 38               | 57        |
| rGO-PC                                       | 1                       | 0.05 M Na <sub>2</sub> SO <sub>4</sub>                        | 20-200       | 1        | 72               | 57        |
| Cu-PC                                        | 1                       | 0.05 M Na <sub>2</sub> SO <sub>4</sub>                        | 20-200       | 1        | 87               | 57        |
| Cu-PC-rGO                                    | 1                       | 0.05 M Na <sub>2</sub> SO <sub>4</sub>                        | 20-200       | 1        | 100              | 57        |
| carbon brush <sup>e</sup>                    |                         | 0.05 M Na <sub>2</sub> SO <sub>4</sub> , FeSO <sub>4</sub>    | 0.04         | 5        | 97               | 58        |
| Ti-RuO <sub>2</sub> <sup>f</sup>             |                         | 0.05 M Na <sub>2</sub> SO <sub>4</sub> , MSWCNTs <sup>f</sup> | 10           | 2        | 100 <sup>g</sup> | 59        |
| Ti-RuO <sub>2</sub> <sup>f</sup>             |                         | 0.05 M Na <sub>2</sub> SO <sub>4</sub> , MSWCNTs <sup>f</sup> | 10           | 2        | ~80 <sup>h</sup> | 59        |
| Ti-RuO <sub>2</sub> <sup>f</sup>             |                         | 0.05 M Na <sub>2</sub> SO <sub>4</sub> , MSWCNTs <sup>f</sup> | 10           | 2        | ~70 <sup>i</sup> | 59        |
| Ti-RuO <sub>2</sub> <sup>f</sup>             |                         | 0.05 M Na <sub>2</sub> SO <sub>4</sub> , MSWCNTs <sup>f</sup> | 10           | 2        | ~60 <sup>j</sup> | 59        |
| Ti-RuO <sub>2</sub> <sup>f</sup>             |                         | 0.05 M Na <sub>2</sub> SO <sub>4</sub> , MSWCNTs <sup>f</sup> | 10           | 2        | ~40 <sup>k</sup> | 59        |
| CNT                                          | 4                       | 0.1 M NaOH                                                    | 592          | 8        | 27               | This work |
| Pt-CNT                                       | 4                       | 0.1 M NaOH                                                    | 592          | 8        | 38               | This work |
| Ru-CNT                                       | 4                       | 0.1 M NaOH                                                    | 592          | 8        | 23               | This work |
| CNT                                          | 4                       | 0.1 M Na <sub>2</sub> CO <sub>3</sub> /NaHCO <sub>3</sub>     | 592          | 6        | 42               | This work |
| Pt-CNT                                       | 4                       | 0.1 M Na <sub>2</sub> CO <sub>3</sub> /NaHCO <sub>3</sub>     | 592          | 6        | 46               | This work |
| Ru-CNT                                       | 4                       | 0.1 M Na <sub>2</sub> CO <sub>3</sub> /NaHCO <sub>3</sub>     | 296          | 6        | 88               | This work |

<sup>a</sup> Boron doped diamond, <sup>b</sup> DCF removal based on TOC, <sup>c</sup> Pt-doped SnO<sub>2</sub>-Sb electrode, <sup>d</sup> Cu-rGO-PC - carbon film-supported Cu-rGO electrode (the carbon film prepared post carbonization of the polymeric film is abbreviated as "PC" and rGO- reduced graphene oxide), <sup>e</sup> bio-electro-Fenton process, (working electrode diameter 5.9 cm, length 6.9 cm), <sup>f</sup> heterogeneous electro-Fenton process, MSWCNTs - magnetic single-walled carbon nanotubes, <sup>c</sup> = 60 mg/L, <sup>g</sup> pH=4-5, <sup>h</sup> pH=6, <sup>i</sup> pH=7, <sup>j</sup> pH= 8-9, <sup>k</sup> pH=10

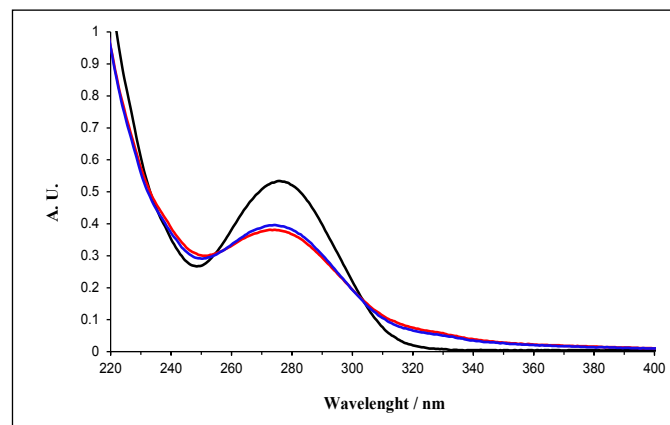

**Figure S1.** UV spectra of DCF standard solution (—) and electrolyzed solutions of DCF (t = 8 h of electrolysis) at Pt/CNT (—) and at Ru/CNT (—) modified electrodes, in 0.1 M NaOH medium.

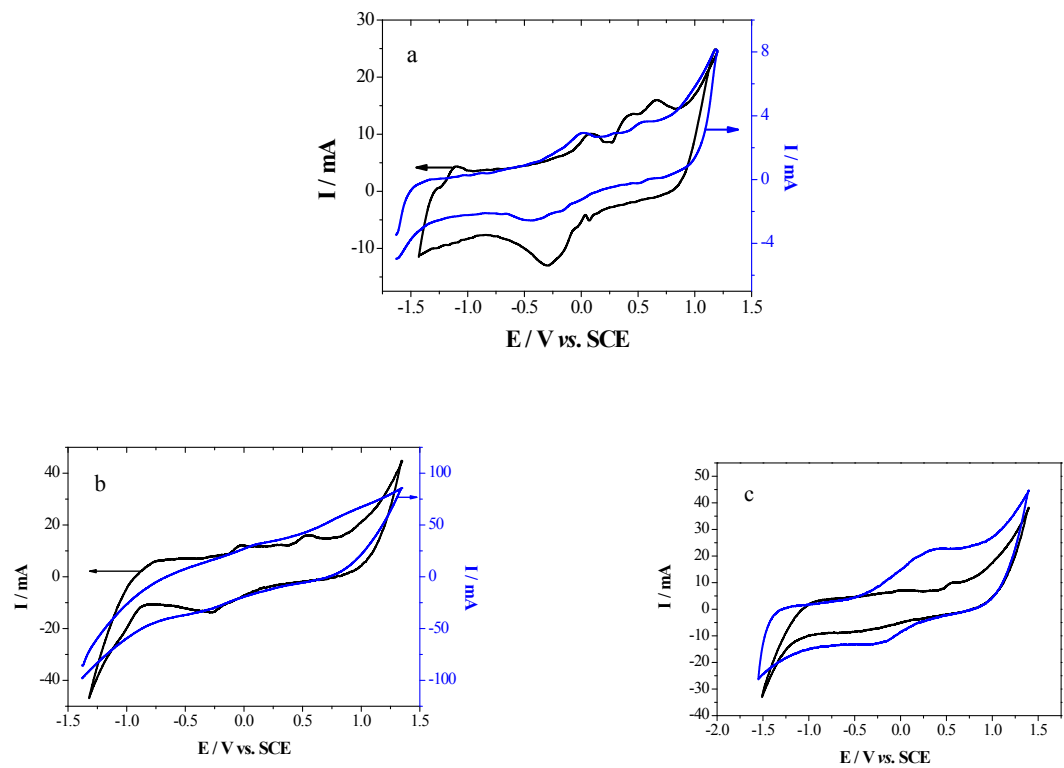

**Figure S2.** Cyclic voltammograms of a) CNT, b) Pt/CNT and c) Ru/CNT, (—) at the beginning and (---) at the end of the electrolysis of 2 mM DCF (at CNT and Pt/CNT modified electrodes) and 1 mM DCF (at Ru/CNT modified electrode).
